# Supplementary material for: Above- and Belowground Plant Mercury Dynamics in a Salt Marsh Estuary in Massachusetts, USA
Source: Copernicus journal article supplement (doi:10.5194/egusphere-2023-720), 2023-05-08
Supplement: Supplementary file 1 [file egusphere-2023-720-supplement.pdf]

# Above- and Belowground Plant Mercury Dynamics in a Salt Marsh Estuary in Massachusetts, USA

Ting Wang<sup>1</sup>, Buyun Du<sup>1</sup>, Inke Forbrich<sup>2</sup>, Jun Zhou<sup>1</sup>, Joshua Polen<sup>1</sup>, Elsie M. Sunderland<sup>3</sup>, Prentiss H. Balcom<sup>3</sup>, Celia Chen<sup>4</sup>, Daniel Obrist<sup>1,5</sup>

<sup>1</sup>Department of Environmental, Earth, and Atmospheric Sciences, University of Massachusetts Lowell, Lowell, MA 01854, USA

<sup>2</sup>Marine Biological Laboratory, Woods Hole, MA 02543, USA

<sup>3</sup>Harvard John A. Paulson School of Engineering and Applied Sciences, Harvard University, Cambridge, MA 02138, USA

<sup>4</sup>Department of Biological Sciences, Dartmouth College, Hanover, NH 03755, USA

<sup>5</sup>Division of Agriculture and Natural Resources, University of California, Davis, CA 95618, USA

Correspondence to: Daniel Obrist ([daniel\\_obrist@uml.edu](mailto:daniel_obrist@uml.edu))

## Supplementary Documents

### Hg Isotope Mixing Model

A ternary isotope mixing model was used to estimate the fractions of Hg in salt marsh plant leaves derived from the three dominant end-member Hg sources (medians). These sources include: (1) salt marsh plants roots, where the median Hg isotope composition of marsh plant roots collected in this study for  $\delta^{202}\text{Hg}$  is -0.69‰ (ranging from -0.75‰ to -0.66‰, n =4), for  $\Delta^{200}\text{Hg}$  is 0.03‰ (ranging from -0.01‰ and 0.04‰), and for  $\Delta^{199}\text{Hg}$  is 0.17 ‰ (ranging from 0.11‰ to 0.22‰); (2) atmospheric GEM, where published upland foliage Hg isotopic signatures are used to represent GEM taken up by plants from atmospheric GEM (on average 88% [79-100%, IQR]) (Zhou et al., 2021). The median Hg isotope compositions of upland foliage for  $\delta^{202}\text{Hg}$  is -2.84‰, for  $\Delta^{199}\text{Hg}$  is -0.37‰, and for  $\Delta^{200}\text{Hg}$  is -0.02‰ (n = 120) (review by Zhou et al., 2021); and (3) precipitation, where the median Hg isotope composition of precipitation is used from previous published data points ( $\delta^{202}\text{Hg}$ : -0.30‰,  $\Delta^{199}\text{Hg}$ : 0.4‰,  $\Delta^{200}\text{Hg}$ : 0.17‰ n = 106) (Table S4) (Jiskra et al., 2021). The calculation equations are as followings:

$$\Delta^{200}\text{Hg}_{vegetation} = f_{atm\_GEM}\Delta^{200}\text{Hg}_{atm\_GEM} + f_{root}\Delta^{200}\text{Hg}_{root} + f_{prep\_Hg(II)}\Delta^{200}\text{Hg}_{prep\_Hg(II)} \quad (1)$$

$$\delta^{202}\text{Hg}_{vegetation} = f_{atm\_GEM}\delta^{202}\text{Hg}_{atm\_GEM} + f_{root}\delta^{202}\text{Hg}_{root} + f_{prep\_Hg(II)}\delta^{202}\text{Hg}_{prep\_Hg(II)} \quad (2)$$

$$f_{atm\_GEM} + f_{root} + f_{prep\_Hg(II)} = 1 \quad (3)$$

We used an excel model to estimate the respective fractions. Our initial constraints were to start with a fraction of atmospheric GEM uptake (based on upland foliage data) as 50%, then adjusted the fractions of roots uptake and precipitation deposition stepwise to calculate values of  $\delta^{202}\text{Hg}$  and  $\Delta^{200}\text{Hg}$  in salt marsh plant leaves. We modified the respective fractions (increasing and decreasing) until we found best estimates of  $\delta^{202}\text{Hg}$  and  $\Delta^{200}\text{Hg}$  corresponding to salt marsh plant leaves (medians value).

### Industrial Hg Isotopic Signatures

The isotopic signatures of industrial Hg are characterized by a wide range of negative  $\delta^{202}\text{Hg}$  values, while  $\Delta^{199}\text{Hg}$  and  $\Delta^{200}\text{Hg}$  values are generally close to zero or positive (Fig S3, Table S4). For example, urban soil Hg signatures in Beijing, China showed  $\delta^{202}\text{Hg}$  values between -1.14‰ and -0.59‰,  $\Delta^{199}\text{Hg}$  values between 0.03‰ and 0.10‰ and  $\Delta^{200}\text{Hg}$  values between 0.02‰ and 0.04‰ (Huang et al., 2016); contaminated coastal marine sediments along Northeastern USA. showed  $\delta^{202}\text{Hg}$  values between -0.82‰ and -0.38‰,  $\Delta^{199}\text{Hg}$  values between 0.01‰ and 0.18‰ and  $\Delta^{200}\text{Hg}$  values between -0.04‰ and 0.02‰ (Kwon et al., 2014);

35 industrial sources impacted sediments of Great Lakes USA showed  $\delta^{202}\text{Hg}$  values between -1.28‰ and -0.14‰,  $\Delta^{199}\text{Hg}$  values  
36 between -0.04‰ and 0.11‰ and  $\Delta^{200}\text{Hg}$  values between -0.02‰ and 0.09‰ (Lepak et al., 2015); and in Northeastern France  
37 showed  $\delta^{202}\text{Hg}$  values between -0.72‰ and -0.16‰ and  $\Delta^{199}\text{Hg}$  values between -0.08‰ and 0.09‰ (Estrade et al., 2011). Similarly,  
38 Hg isotopic signatures in historic industrial influenced bank soils of Virginia, USA, showed  $\delta^{202}\text{Hg}$  values between -1.05‰ and -  
39 0.18‰,  $\Delta^{199}\text{Hg}$  values between 0.00‰ and 0.10‰, and  $\Delta^{200}\text{Hg}$  values between -0.02‰ and 0.03‰ (Washburn et al., 2017).

40

41 **Table S1. Hg concentrations, dry weights, and Hg mass of above- and belowground biomass and surface soils of the two plant dominated**  
 42 **communities.**

| Items                     | Plant species          | Hg concentration<br>$\mu\text{g kg}^{-1}$ | STD   | Dry Weight<br>$\text{g m}^{-2}$ | STD   | Hg mass<br>$\mu\text{g m}^{-2}$ | STD     |
|---------------------------|------------------------|-------------------------------------------|-------|---------------------------------|-------|---------------------------------|---------|
| Live root                 | <i>S. alterniflora</i> | 84.5                                      | 47.0  | 278                             | 61    | 22.0                            | 7.9     |
|                           | <i>S. patens</i>       | 258.9                                     | 70.3  | 444                             | 87    | 118.0                           | 53.8    |
| Live rhizome              | <i>S. alterniflora</i> | 27.9                                      | 1.1   | 598                             | 44    | 18.8                            | 3.5     |
|                           | <i>S. patens</i>       | 46.6                                      | 14.2  | 987                             | 87    | 57.4                            | 2.9     |
| Senesced biomass_0-20cm   | <i>S. alterniflora</i> | 318.0                                     | 30.1  | 54                              | 9     | 1912.3                          | 606.3   |
|                           | <i>S. patens</i>       | 323.3                                     | 135.4 | 6537                            | 611   | 2068.0                          | 1017.3  |
| Mineral and humus_0-20cm  | <i>S. patens</i>       | 272.3                                     | 11.6  |                                 |       |                                 |         |
| Bulk soil_0-20cm          | <i>S. alterniflora</i> | 194.6                                     | 28.3  | 71078                           | 6794  | 13925.8                         | 3334.7  |
|                           | <i>S. patens</i>       | 171.2                                     | 72.1  | 53193                           | 10143 | 9470.1                          | 5570.3  |
| Senesced biomass_20-40cm  | <i>S. alterniflora</i> | 639.1                                     | 337.1 | 2660                            | 3704  | 3077.7                          | 1512.2  |
|                           | <i>S. patens</i>       | 263.1                                     | 208.7 | 5119                            | 977   | 1174.2                          | 845.2   |
| Mineral and humus_20-40cm | <i>S. patens</i>       | 73.1                                      | 10.2  |                                 |       |                                 |         |
| Bulk soil_20-40cm         | <i>S. alterniflora</i> | 279.1                                     | 203.8 | 70523                           | 2904  | 19977.1                         | 15183.1 |
|                           | <i>S. patens</i>       | 159.1                                     | 122.7 | 55838                           | 18002 | 7777.1                          | 3986.2  |

43

44 Table S2. Hg concentrations, dry weights, and Hg mass of above- and belowground biomass and surface soils of the combined plant  
 45 communities.

|             | Items                 | Hg concentration<br>$\mu\text{g kg}^{-1}$ | STD   | Dry biomass weight<br>$\text{g m}^{-2}$ | STD    | Hg mass<br>$\mu\text{g m}^{-2}$ | STD      |
|-------------|-----------------------|-------------------------------------------|-------|-----------------------------------------|--------|---------------------------------|----------|
| Belowground | Live Root             | 171.7                                     | 111.9 | 361                                     | 114    | 70.0                            | 63.7     |
|             | Live Rhizome          | 37.3                                      | 13.6  | 792                                     | 231    | 38.1                            | 22.4     |
|             | Live Root and Rhizome | 84.6                                      | 49.1  | 1,153                                   | 321    | 108.1                           | 83.4     |
|             | Senesced Biomass      | 385.9                                     | 224.2 | 11,724                                  | 1,165  | 4,116.1                         | 1,141.0  |
|             | Mineral and Humus     | 172.7                                     | 140.8 | 112,439                                 | -      | 21,350.9                        | -        |
|             | Bulk Soil             | 202.1                                     | 117.8 | 125,316                                 | 25,475 | 25,575.1                        | 14,408.7 |
| Aboveground | Green Biomass         | 16.2                                      | 2.0   | 368                                     | 149    | 5.7                             | 2.1      |
|             | Senesced Biomass      | 15.2                                      | 2.2   | 215                                     | 92     | 3.3                             | 1.7      |
|             | Green and Senesced    | -                                         | -     | 583                                     | 208    | 9.0                             | 3.3      |

46

47 **Table S3. Hg isotope signatures in salt marsh plant tissues and soils and their corresponding Hg concentrations.**

| Item                   | Sample ID  | THg<br>concentration<br>(ng g <sup>-1</sup> ) | $\delta^{202}\text{Hg}$ (‰) | $\Delta^{200}\text{Hg}$ (‰) | $\Delta^{199}\text{Hg}$ (‰) | $\Delta^{201}\text{Hg}$ (‰) |
|------------------------|------------|-----------------------------------------------|-----------------------------|-----------------------------|-----------------------------|-----------------------------|
| Aboveground<br>biomass | ABO-L-1    | 4.6                                           | -1.07                       | 0.11                        | 0.20                        | 0.16                        |
|                        | ABO-L-2    | 8.0                                           | -1.61                       | 0.06                        | 0.43                        | 0.26                        |
|                        | ABO-L-3    | 6.9                                           | -1.21                       | 0.07                        | 0.42                        | 0.23                        |
|                        | ABO-L-4    | 7.9                                           | -1.29                       | 0.04                        | 0.32                        | 0.11                        |
| Rhizome                | BL-RHI-1   | 28.7                                          | -0.70                       | -0.03                       | 0.16                        | -0.02                       |
|                        | BL-RHI-2   | 35.0                                          | -1.31                       | 0.04                        | 0.13                        | 0.08                        |
|                        | BL-RHI-3   | 18.0                                          | -0.80                       | 0.02                        | 0.15                        | 0.11                        |
|                        | BL-RHI-4   | 36.5                                          | -1.41                       | -0.05                       | 0.22                        | 0.09                        |
| Root                   | BL-ROOT1   | 52.4                                          | -0.69                       | 0.04                        | 0.20                        | 0.06                        |
|                        | BL-ROOT2   | 138.0                                         | -0.75                       | 0.04                        | 0.22                        | 0.08                        |
|                        | BL-ROOT3   | 93.0                                          | -0.66                       | 0.02                        | 0.13                        | 0.03                        |
|                        | BL-ROOT3-2 | 93.0                                          | -0.73                       | 0.01                        | 0.14                        | 0.01                        |
|                        | BL-ROOT4   | 308.6                                         | -0.69                       | -0.01                       | 0.11                        | 0.07                        |
| Surface Soil           | S1L1       | 172                                           | -0.32                       | 0.03                        | 0.14                        | 0.10                        |
|                        | S1L2       | 275                                           | -0.41                       | -0.02                       | 0.16                        | 0.02                        |
|                        | S1L3-4     | 378                                           | -0.42                       | 0.01                        | 0.17                        | 0.01                        |
|                        | S2L1       | 220                                           | -0.36                       | 0.05                        | 0.17                        | 0.11                        |
|                        | S2L2       | 429                                           | -0.35                       | 0.05                        | 0.17                        | 0.06                        |
|                        | S2L3-4     | 373                                           | -0.29                       | 0.03                        | 0.16                        | 0.06                        |
|                        | S3L1       | 119                                           | -0.31                       | -0.01                       | 0.17                        | 0.01                        |
|                        | S3L1-2     | 119                                           | -0.39                       | 0.00                        | 0.13                        | 0.06                        |
|                        | S3L2       | 269                                           | -0.60                       | 0.02                        | 0.07                        | 0.07                        |
|                        | S3L3-4     | 406                                           | -0.44                       | 0.00                        | 0.15                        | 0.03                        |
|                        | S4L1       | 191                                           | -0.41                       | -0.01                       | 0.15                        | 0.00                        |
|                        | S4L2       | 349                                           | -0.41                       | 0.03                        | 0.20                        | 0.03                        |
|                        | S4L3-4     | 416                                           | -0.42                       | 0.00                        | 0.11                        | -0.02                       |
|                        | Deep Soil  | S1L9                                          | 57                          | -0.51                       | -0.01                       | 0.04                        |
| S2L9                   |            | 56                                            | -0.53                       | 0.00                        | 0.10                        | 0.12                        |
| S3L9                   |            | 9                                             | -0.72                       | 0.04                        | 0.19                        | -0.02                       |
| S4L9                   |            | 19                                            | -0.92                       | 0.03                        | -0.09                       | -0.13                       |
| S4L9-2                 |            | 19                                            | -0.92                       | 0.02                        | -0.07                       | -0.12                       |

48

49

50

51 **Table S4. Hg isotopic signatures of salt marsh plants and soils (this study) and other published data.**

| Item                        | $\delta^{202}\text{Hg}$ (‰) |                | $\Delta^{199}\text{Hg}$ (‰) |                | $\Delta^{200}\text{Hg}$ (‰) |                | Reference                                                                                              |
|-----------------------------|-----------------------------|----------------|-----------------------------|----------------|-----------------------------|----------------|--------------------------------------------------------------------------------------------------------|
|                             | Median                      | Min to Max     | Median                      | Min to Max     | Median                      | Min to Max     |                                                                                                        |
| Aboveground veg. (n=4)      | -1.25                       | -1.61 to -1.07 | 0.37                        | 0.20 to 0.43   | 0.06                        | 0.04 to 0.11   | this study                                                                                             |
| Rhizome (n=4)               | -1.05                       | -1.41 to -0.70 | 0.16                        | 0.13 to 0.22   | -0.01                       | -0.05 to 0.04  | this study                                                                                             |
| Root (n=4)                  | -0.69                       | -0.75 to -0.66 | 0.17                        | 0.11 to 0.22   | 0.03                        | -0.01 to 0.04  | this study                                                                                             |
| Root and rhizome (n=8)      | -0.73                       | -1.41 to -0.66 | 0.16                        | 0.11 to 0.22   | 0.02                        | -0.05 to 0.04  | this study                                                                                             |
| Soil (n=16)                 | -0.42                       | -0.92 to -0.29 | 0.15                        | -0.02 to 0.20  | 0.01                        | -0.02 to 0.05  | this study                                                                                             |
| Item                        | $\delta^{202}\text{Hg}$ (‰) |                | $\Delta^{199}\text{Hg}$ (‰) |                | $\Delta^{200}\text{Hg}$ (‰) |                | Reference                                                                                              |
|                             | Median                      | IQR*           | Median                      | IQR            | Median                      | IQR            |                                                                                                        |
| Upland veg. (n=120)         | -2.84                       | -3.06 to -2.37 | -0.37                       | -0.42 to -0.27 | -0.02                       | -0.05 to 0.01  | Review by Zhou et al., 2021                                                                            |
| Rainfall (n=106)            | -0.30                       | -0.63 to 0.03  | 0.40                        | 0.21 to 0.52   | 0.17                        | 0.11 to 0.22   | Jiskra et al., 2021                                                                                    |
| Ocean sediment (n=92)       | -0.85                       | -1.21 to -0.49 | 0.08                        | 0.02 to 0.11   | 0.02                        | 0.01 to 0.04   | Jiskra et al., 2021                                                                                    |
| Ocean water total Hg (n=16) | -0.24                       | -0.42 to -0.04 | 0.06                        | 0.02 to 0.01   | 0.02                        | -0.01 to 0.03  | Jiskra et al., 2021                                                                                    |
| Atm Hg (n=220)              | 0.43                        | 0.09 to 0.77   | -0.20                       | -0.13 to -0.06 | -0.05                       | -0.08 to -0.03 | Jiskra et al., 2021                                                                                    |
| Industrial Hg (n=46)        | -0.64                       | -0.72 to -0.42 | 0.02                        | -0.03 to 0.04  | 0.01                        | 0.00 to 0.03   | Estrade et al., 2011; Huang et al., 2016; Kwon et al., 2014; Lepak et al., 2015; Washburn et al., 2017 |

52 \*IQR: Inter-Quartile Range

53

54 Table S5. Hg concentrations in washed and unwashed aboveground green biomass samples.

| Date           | <i>S. alterniflora</i> - unwashed          |            | <i>S. alterniflora</i> - washed*           |            | Estimated throughfall ( $\mu\text{g kg}^{-1}$ )** |
|----------------|--------------------------------------------|------------|--------------------------------------------|------------|---------------------------------------------------|
|                | Hg Concentration ( $\mu\text{g kg}^{-1}$ ) | STD        | Hg Concentration ( $\mu\text{g kg}^{-1}$ ) | STD        |                                                   |
| Aug-21         | 10.1                                       | 0.2        | 7.0                                        | 0.0        | 3.1                                               |
| Sep-21         | 9.7                                        | 2.8        | 7.9                                        | 0.6        | 1.8                                               |
| Oct-21         | 10.8                                       | 3.2        | 11.4                                       | 4.9        | -0.7                                              |
| Nov-21         | 15.8                                       | 1.2        | 16.2                                       | 2.6        | -0.4                                              |
| <b>Average</b> | <b>11.8</b>                                | <b>3.4</b> | <b>11.1</b>                                | <b>4.6</b> | <b>0.7</b>                                        |

  

| Date           | <i>S. patens</i> - unwashed                |            | <i>S. patens</i> - washed*                 |            | Estimated throughfall ( $\mu\text{g kg}^{-1}$ )** |
|----------------|--------------------------------------------|------------|--------------------------------------------|------------|---------------------------------------------------|
|                | Hg Concentration ( $\mu\text{g kg}^{-1}$ ) | STD        | Hg Concentration ( $\mu\text{g kg}^{-1}$ ) | STD        |                                                   |
| Aug-21         | 8.6                                        | 1.0        | 7.0                                        | 0.6        | 1.5                                               |
| Sep-21         | 10.9                                       | 2.1        | 9.0                                        | 1.0        | 1.9                                               |
| Oct-21         | 12.8                                       | 1.7        | 11.8                                       | 1.0        | 1.0                                               |
| Nov-21         | 18.8                                       | 3.2        | 16.2                                       | 1.7        | 2.6                                               |
| <b>Average</b> | <b>13.0</b>                                | <b>4.3</b> | <b>11.3</b>                                | <b>3.7</b> | <b>1.8</b>                                        |

55 \* Assumed structural Hg (not subject to throughfall).

56 \*\* Throughfall is estimated as amount of Hg washed off from aboveground tissues

57

Table S6. Comparing Hg concentrations in aboveground plants and roots with other contaminated and non-contaminated marsh vegetation.

| Study sites                            | Plant Species                        | Session     | THg<br>$\mu\text{g kg}^{-1}$ | Reference                    | Note          |
|----------------------------------------|--------------------------------------|-------------|------------------------------|------------------------------|---------------|
| Piles Creek, NJ, USA                   | <i>S. alterniflora</i>               | Aboveground | 160 $\pm$ 70.0               | Kraus et al., 1986           | Contamination |
| Hackensack Meadowlands, NJ, USA        | <i>Phragmites australis</i>          | Aboveground | 18-30                        | Windham et al., 2001         | Contamination |
|                                        | <i>S. alterniflora</i>               |             | 30-90                        |                              |               |
| Ria de Aveiro Coastal Lagoon, Portugal | <i>Halimione portulacoides</i>       | Aboveground | 88-970                       | Anjum et al., 2011           | Contamination |
|                                        |                                      | Root        | 248-9,957                    |                              |               |
|                                        | <i>Juncus maritimus</i><br>Collected | Aboveground | 23-268                       |                              |               |
| Tagus estuary, Portugal                |                                      | Root        | 417-23,330                   | Canário et al., 2017         | Contamination |
|                                        | <i>Halimione Portulacoides</i>       |             | 53 $\pm$ 12                  |                              |               |
|                                        | <i>Sarcocornia fruticosa</i>         | Aboveground | 12 $\pm$ 7                   |                              |               |
| Tagus estuary, Portugal                | <i>S. maritima</i>                   |             | 23 $\pm$ 9                   | Canário et al., 2017         | Contamination |
|                                        | <i>Halimione Portulacoides</i>       | Root        | 1124 $\pm$ 21                |                              |               |
|                                        | <i>Sarcocornia fruticosa</i>         |             | 873 $\pm$ 39                 |                              |               |
| Salt marsh, northern Spain             | <i>S. maritima</i>                   |             | 1031 $\pm$ 42                | Garcia-Ordiales et al., 2020 | Contamination |
|                                        | <i>Juncus maritimus</i>              | Aboveground | 10-194                       |                              |               |
|                                        |                                      | Root        | 58-2,522                     |                              |               |
| Yangtze River estuary, China           | overall                              |             | 12.5 $\pm$ 2.5 (9.0-17.4)    | Wang et al., 2021            | Contamination |
|                                        | <i>S. alterniflora</i>               | Aboveground | 10.2 $\pm$ 0.9               |                              |               |
|                                        | <i>P. australis</i>                  |             | 12.6 $\pm$ 1.8               |                              |               |
|                                        | <i>S. marqueter</i>                  |             | 14.7 $\pm$ 1.8               |                              |               |
| Yangtze River estuary, China           | <i>S. alterniflora</i>               | Root        | 36.6 $\pm$ 6.7               | Wang et al., 2021            | Contamination |
|                                        | <i>P. australis</i>                  |             | 9.9 $\pm$ 2.9                |                              |               |
|                                        | <i>S. marqueter</i>                  |             | 34.0 $\pm$ 4.7               |                              |               |

59

60

61

62

63

64



65 **Table S6. Comparing Hg concentrations in aboveground and roots with other contaminated and non-contaminated marsh vegetation (Continued).**

| Study sites                               | Plant Species                     | Session     | THg<br>$\mu\text{g kg}^{-1}$ | Reference              | Note             |
|-------------------------------------------|-----------------------------------|-------------|------------------------------|------------------------|------------------|
| Big Sheepshead Creek, NJ, USA             | <i>S. alterniflora</i>            | Aboveground | 20 $\pm$ 0                   | Kraus et al., 1986     | No contamination |
| Great Bay Estuary, NH, USA                | <i>S. alterniflora</i>            | Aboveground | 4.61-33.4                    | Heller and Weber, 1998 | No contamination |
| Ria de Aveiro Coastal Lagoon,<br>Portugal | <i>Halimione portulacoides</i>    | Aboveground | 32-79                        | Anjum et al., 2011     | No Contamination |
|                                           |                                   | Root        | 153-802                      |                        |                  |
|                                           | <i>Juncus maritimus</i> Collected | Aboveground | 3-24                         |                        |                  |
|                                           |                                   | Root        | 152-358                      |                        |                  |
| Parker River, MA, USA                     | Overall (n=56)                    |             | 7.6 $\pm$ 5.5* (0.8-24.0)    | This study             | No contamination |
|                                           | <i>S. alterniflora</i>            | Aboveground | 5.1 $\pm$ 3.3* (0.8-11.7)    |                        |                  |
|                                           | <i>S. patens</i>                  |             | 9.7 $\pm$ 6.6* (2.0-24.0)    |                        |                  |
| Parker River, MA, USA                     | Overall (n=4)                     |             | 171.7 $\pm$ 111.9            | This study             | No contamination |
|                                           | <i>S. alterniflora</i>            | Root        | 84.5 $\pm$ 47.0              |                        |                  |
|                                           | <i>S. patens</i>                  |             | 258.9 $\pm$ 70.3             |                        |                  |

66 \* Range across growing season and late season maximum values

67

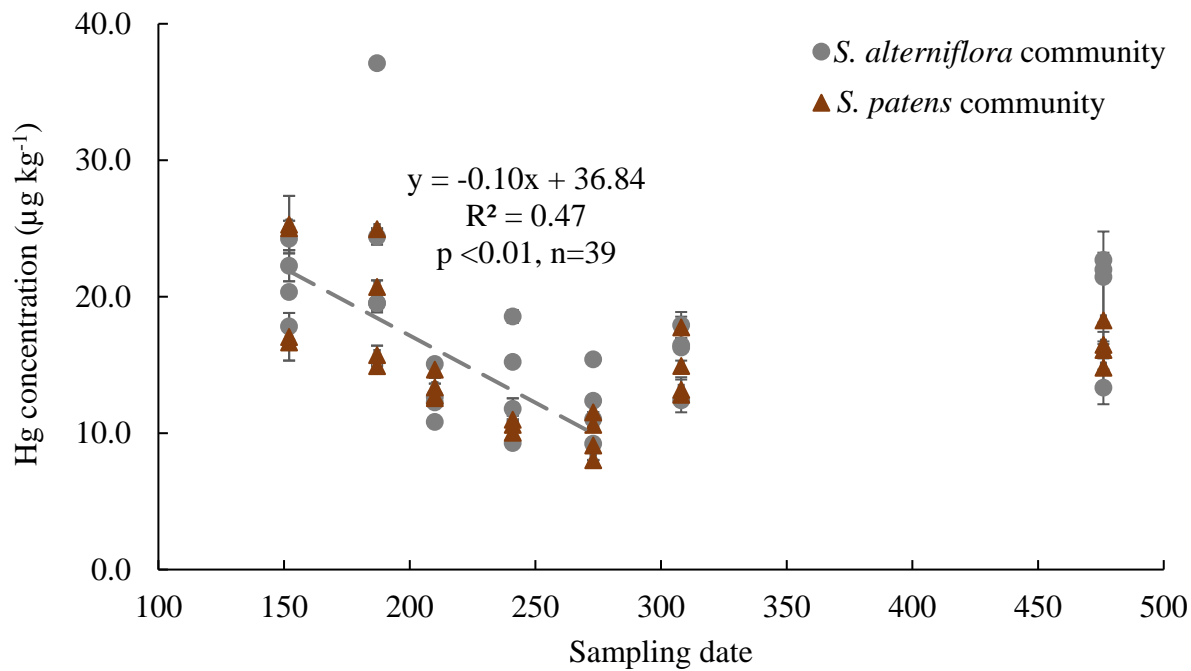

68

69 **Figure S1. Hg concentrations of seasonal patterns of senesced *S. alterniflora* and *S. patens* communities with sampling dates in 2021.**  
 70 **Grey circles denote of senesced *S. alterniflora* communities, and brown triangles denote of senesced *S. patens* communities. Standard**  
 71 **errors indicate four replicates.**

72

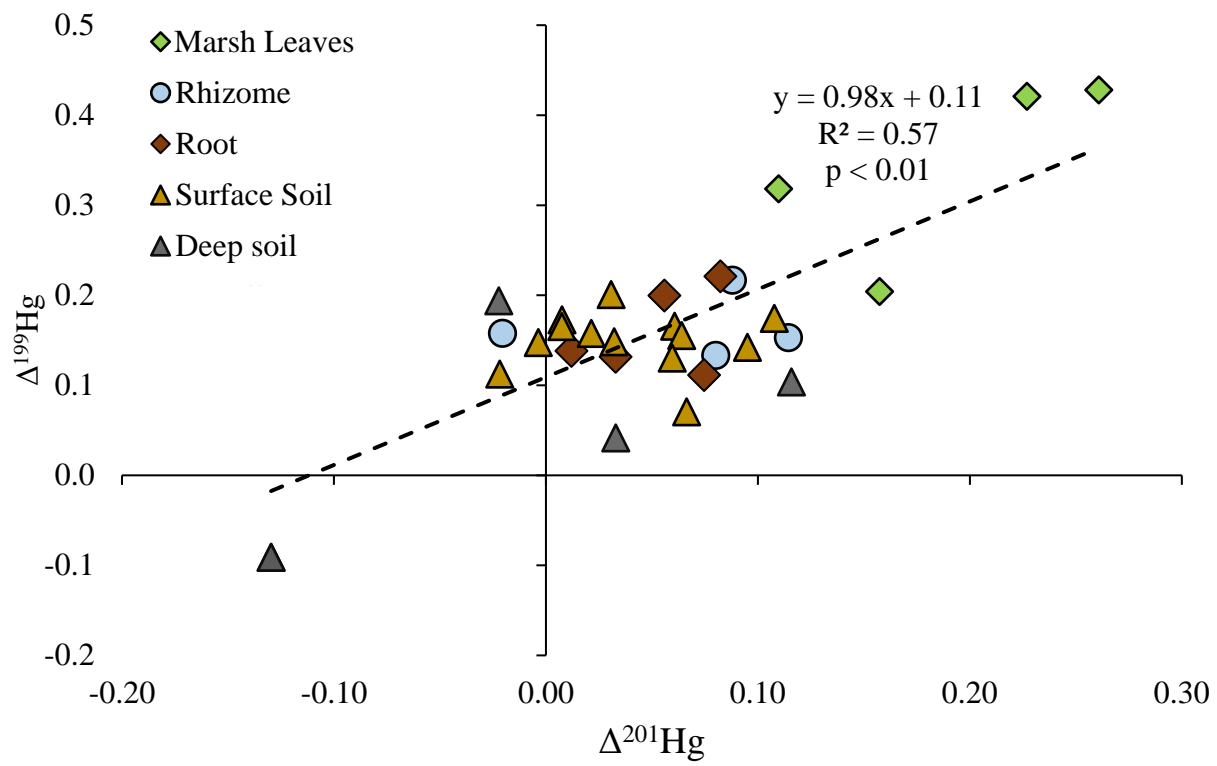

73

74 **Figure S2. Relationship between  $\Delta^{201}\text{Hg}$  and  $\Delta^{199}\text{Hg}$  of all salt marsh samples. Different color symbols indicate different types of salt**  
 75 **marsh samples.**

76

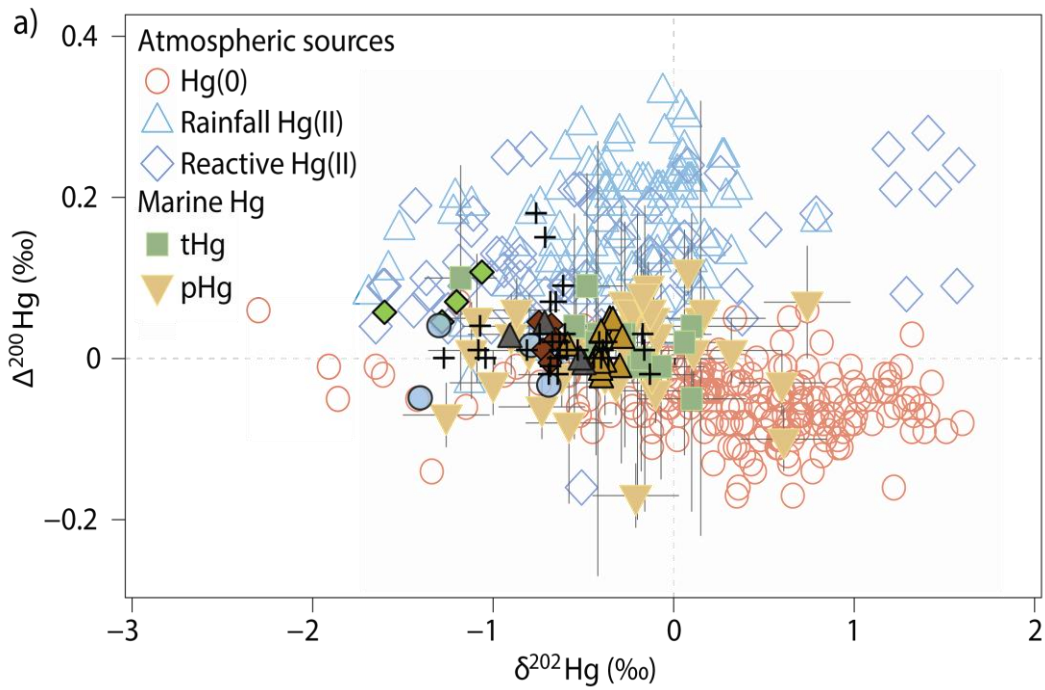

77

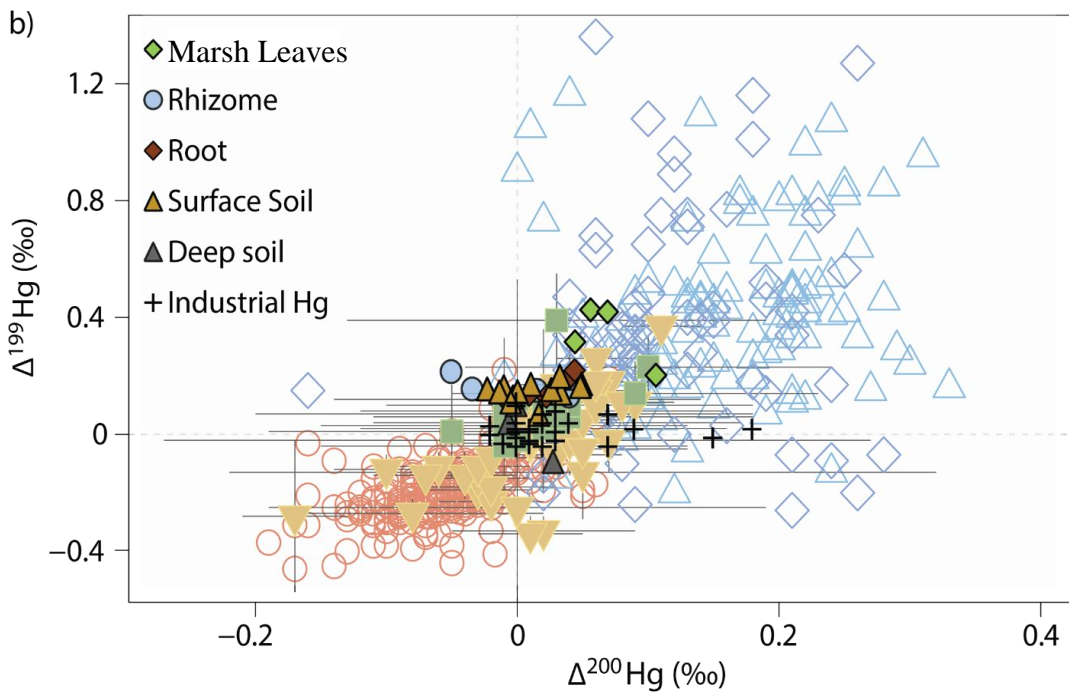

78

79 **Figure S3. Relationships of  $\Delta^{202}\text{Hg}$  and  $\Delta^{199}\text{Hg}$  (a), and of  $\Delta^{200}\text{Hg}$  and  $\Delta^{199}\text{Hg}$  (b) of previous published marine Hg sources,**  
 80 **atmospheric Hg sources (Jiskra et al., 2021), industrial Hg polluted soils and sediments (Estrade et al., 2011; Huang et al., 2016; Kwon**  
 81 **et al., 2014; Lepak et al., 2015; Washburn et al., 2017), along with Hg signatures of marsh plants and soils in this study. Different color**  
 82 **symbols indicate different marsh samples.**

83

## 84 References

- 85 Anjum, N. A., Ahmad, I., Válega, M., Pacheco, M., Figueira, E., Duarte, A. C., & Pereira, E. (2011). Impact of seasonal  
86 fluctuations on the sediment-mercury, its accumulation and partitioning in *Halimione portulacoides* and *Juncus*  
87 *maritimus* collected from Ria de Aveiro coastal lagoon (Portugal). *Water, Air, and Soil Pollution*, 222(1–4), 1–15.  
88 <https://doi.org/10.1007/s11270-011-0799-4>
- 89 Canário, J., Poissant, L., Pilote, M., Caetano, M., Hintelmann, H., & O’Driscoll, N. J. (2017). Salt-marsh plants as  
90 potential sources of Hg<sup>0</sup> into the atmosphere. *Atmospheric Environment*, 152, 458–464.  
91 <https://doi.org/10.1016/j.atmosenv.2017.01.011>
- 92 Estrade, N., Carignan, J., & Donard, O. F. X. (2011). Tracing and quantifying anthropogenic mercury sources in soils  
93 of northern France using isotopic signatures. *Environmental Science and Technology*, 45(4), 1235–1242.  
94 <https://doi.org/10.1021/es1026823>
- 95 Garcia-Ordiales, E., Roqueñí, N., & Loredó, J. (2020). Mercury bioaccumulation by *Juncus maritimus* grown in a Hg  
96 contaminated salt marsh (northern Spain). *Marine Chemistry*, 226, 103859.  
97 <https://doi.org/10.1016/j.marchem.2020.103859>
- 98 Heller, A. A., & Weber, J. H. (1998). Seasonal study of speciation of mercury(II) and monomethylmercury in *Spartina*  
99 *alterniflora* from the Great Bay Estuary, NH. *Science of the Total Environment*, 221(2–3), 181–188.  
100 [https://doi.org/10.1016/S0048-9697\(98\)00285-X](https://doi.org/10.1016/S0048-9697(98)00285-X)
- 101 Huang, Q., Chen, J., Huang, W., Fu, P., Guinot, B., Feng, X., ... Yu, B. (2016). Isotopic composition for source  
102 identification of mercury in atmospheric fine particles. *Atmospheric Chemistry and Physics*, 16(18), 11773–11786.  
103 <https://doi.org/10.5194/acp-16-11773-2016>
- 104 Jiskra, M., Heimbürger-Boavida, L.-E., Desgranges, M.-M., Petrova, M. V., Dufour, A., Ferreira-Araujo, B., ... Sonke,  
105 J. E. (2021). Mercury stable isotopes constrain atmospheric sources to the ocean. *Nature*, 597(7878), 678–682.  
106 <https://doi.org/10.1038/s41586-021-03859-8>
- 107 Kraus, M. L., Weis, P., & Crow, J. H. (1986). The excretion of heavy metals by the salt marsh cord grass, *Spartina*  
108 *alterniflora*, and *Spartina*’s role in mercury cycling. *Marine Environmental Research*, 20(4), 307–316.  
109 [https://doi.org/10.1016/0141-1136\(86\)90056-5](https://doi.org/10.1016/0141-1136(86)90056-5)
- 110 Kwon, S. Y., Blum, J. D., Chen, C. Y., Meattay, D. E., & Mason, R. P. (2014). Mercury isotope study of sources and  
111 exposure pathways of methylmercury in estuarine food webs in the northeastern U.S. *Environmental Science and*  
112 *Technology*, 48(17), 10089–10097. <https://doi.org/10.1021/es5020554>
- 113 Lepak, R. F., Yin, R., Krabbenhoft, D. P., Ogorek, J. M., Dewild, J. F., Holsen, T. M., & Hurley, J. P. (2015). Use of  
114 Stable Isotope Signatures to Determine Mercury Sources in the Great Lakes. *Environmental Science and Technology*  
115 *Letters*, 2(12), 335–341. <https://doi.org/10.1021/acs.estlett.5b00277>
- 116 Wang, Y., Wang, Z., Zheng, X., & Zhou, L. (2021). Influence of *Spartina alterniflora* invasion on mercury storage and  
117 methylation in the sediments of Yangtze River estuarine wetlands. *Estuarine, Coastal and Shelf Science*, 265(June  
118 2021), 107717. <https://doi.org/10.1016/j.ecss.2021.107717>
- 119 Washburn, S. J., Blum, J. D., Demers, J. D., Kurz, A. Y., & Landis, R. C. (2017). Isotopic Characterization of Mercury

120 Downstream of Historic Industrial Contamination in the South River, Virginia. *Environmental Science and Technology*,  
121 51(19), 10965–10973. <https://doi.org/10.1021/acs.est.7b02577>

122 Weis, J. S., & Weis, P. (2004). Metal uptake, transport and release by wetland plants: implications for phytoremediation  
123 and restoration. *Environment International*, 30(5), 685–700. <https://doi.org/10.1016/j.envint.2003.11.002>

124 Windham, L, Weis, J. ., & Weis, P. (2003). Uptake and distribution of metals in two dominant salt marsh macrophytes,  
125 *Spartina alterniflora* (cordgrass) and *Phragmites australis* (common reed). *Estuarine, Coastal and Shelf Science*, 56(1),  
126 63–72. [https://doi.org/10.1016/S0272-7714\(02\)00121-X](https://doi.org/10.1016/S0272-7714(02)00121-X)

127 Windham, Lisamarie, Weis, J. S., & Weis, P. (2001). Patterns and processes of mercury release from leaves of two  
128 dominant salt marsh macrophytes, *Phragmites australis* and *Spartina alterniflora*. *Estuaries*, 24(6 A), 787–795.  
129 <https://doi.org/10.2307/1353170>

130 Zhou, J., Obrist, D., Dastoor, A., Jiskra, M., & Ryjkov, A. (2021). Vegetation uptake of mercury and impacts on global  
131 cycling. *Nature Reviews Earth & Environment*, 2(4), 269–284. <https://doi.org/10.1038/s43017-021-00146-y>

132
